# Supplementary material for: Downstream Biomarker Effects of Gantenerumab or Solanezumab in Dominantly Inherited Alzheimer Disease: The DIAN-TU-001 Randomized Clinical Trial
Source: PubMed Central journal article supplement (PMC11059071; doi:10.1001/jamaneurol.2024.0991), 2024-04-29

## Supplementary Online Content

Wagemann O, Liu H, Wang G, et al; Dominantly Inherited Alzheimer Network–Trials Unit. Downstream biomarker effects of gantenerumab or solanezumab in dominantly inherited Alzheimer disease: the DIAN-TU-001 randomized clinical trial. *JAMA Neurol*. Published online April 29, 2024. doi:10.1001/jamaneurol.2024.0991

**eTable 1.** MMRM Estimated Differences in the Mean Change Between Treatments and Placebo From Baseline at Each Postbaseline Visit in Asymptomatic Participants (CDR0)

**eTable 2.** MMRM Estimated Differences in the Mean Change Between Treatments and Placebo From Baseline at Each Postbaseline Visit in Symptomatic Participants (CDR>0)

**eTable 3.** Spearman Correlations of Fluid Biomarkers and Imaging Measures in Participants Receiving Gantenerumab, Solanezumab, or Placebo

**eTable 4.** MRMM Analysis of the Longitudinal Changes Compared to Placebo in CSF and Plasma Biomarkers During Treatment With Gantenerumab or Solanezumab, Excluding a Visually Identified Outlier in the Gantenerumab Arm

**eTable 5.** MRMM Analysis of the Longitudinal Changes Compared to Placebo in CSF and plasma Biomarkers During Treatment With Gantenerumab or Solanezumab in Symptomatic Participants (CDR>0), Excluding a Visually Identified Outlier in the Gantenerumab Arm

**eTable 6.** Comparison of Simoa and Elecsys Assay for CSF NfL (log)

**eFigure 1.** Mean Change From Baseline and 95% Confident Intervals for the Treatment With Gantenerumab, or Placebo Based on Exploratory MMRM Analyses in the Separate CDR Subgroups

**eFigure 2.** Mean Change From Baseline and 95% Confident Intervals for the Treatment With Solanezumab, or Placebo Based on Exploratory MMRM Analyses in the Separate CDR Subgroups

**eFigure 3.** Heatmap Displaying Correlation Coefficients Derived From the Individual Rate of Change for CSF Levels of Neurogranin, sTREM2, GFAP, NfL and Plasma Levels of GFAP and NfL as Well as PiB PET Composite, FDG PET Tracer Binding in the Precuneus, and MRI Precuneus Thickness in Participants Receiving Placebo

This supplementary material has been provided by the authors to give readers additional information about their work.

S-Table 1: MMRM Estimated differences in the mean change between treatments and placebo from baseline at each post-baseline visit in asymptomatic participants (CDR0). Each year represents the time duration of drug administration since the initial biomarker assessment at baseline.

|                                | Year | Sample size | Estimated least-square mean change from baseline | SE    | Lower 95% CI | Upper 95% CI | P-value |
|--------------------------------|------|-------------|--------------------------------------------------|-------|--------------|--------------|---------|
| <b>CSF Neurogranin (pg/mL)</b> |      |             |                                                  |       |              |              |         |
| Gantenerumab                   | 1    | 25          | -36.950                                          | 54.69 | -145.36      | 71.46        | 0.501   |
|                                | 2    | 26          | -93.241                                          | 80.22 | -252.24      | 65.76        | 0.248   |
|                                | 4    | 20          | -311.260                                         | 80.51 | -470.85      | -151.67      | <0.001  |
| Solanezumab                    | 1    | 24          | 57.980                                           | 54.29 | -49.66       | 165.62       | 0.288   |
|                                | 2    | 23          | 94.436                                           | 63.27 | -30.99       | 219.87       | 0.139   |
|                                | 4    | 22          | 88.023                                           | 83.32 | -77.17       | 253.21       | 0.293   |
| <b>CSF sTREM2 (ng/mL)</b>      |      |             |                                                  |       |              |              |         |
| Gantenerumab                   | 1    | 25          | 0.946                                            | 0.38  | 0.19         | 1.70         | 0.015   |
|                                | 2    | 26          | 1.349                                            | 0.48  | 0.39         | 2.30         | 0.006   |
|                                | 4    | 20          | 1.481                                            | 0.56  | 0.37         | 2.60         | <0.01   |
| Solanezumab                    | 1    | 24          | -0.168                                           | 0.41  | -0.98        | 0.64         | 0.683   |
|                                | 2    | 23          | 0.269                                            | 0.41  | -0.55        | 1.09         | 0.516   |
|                                | 4    | 22          | -0.146                                           | 0.44  | -1.02        | 0.73         | 0.743   |
| <b>CSF YKL-40 (ng/ml)</b>      |      |             |                                                  |       |              |              |         |
| Gantenerumab                   | 1    | 25          | 9.596                                            | 6.39  | -3.08        | 22.27        | 0.136   |
|                                | 2    | 26          | 5.831                                            | 5.28  | -4.63        | 16.30        | 0.272   |
|                                | 4    | 20          | 14.997                                           | 11.64 | -8.08        | 38.07        | 0.200   |
| Solanezumab                    | 1    | 24          | -3.675                                           | 6.10  | -15.76       | 8.41         | 0.548   |
|                                | 2    | 23          | -0.884                                           | 5.59  | -11.97       | 10.20        | 0.875   |
|                                | 4    | 22          | -1.724                                           | 7.12  | -15.84       | 12.40        | 0.809   |
| <b>CSF GFAP (ng/mL)</b>        |      |             |                                                  |       |              |              |         |
| Gantenerumab                   | 1    | 26          | -0.009                                           | 0.37  | -0.74        | 0.72         | 0.981   |
|                                | 2    | 27          | -0.146                                           | 0.47  | -1.07        | 0.78         | 0.756   |
|                                | 4    | 21          | -0.925                                           | 0.66  | -2.22        | 0.37         | 0.161   |
| Solanezumab                    | 1    | 24          | -0.192                                           | 0.37  | -0.92        | 0.54         | 0.603   |
|                                | 2    | 22          | 0.116                                            | 0.42  | -0.72        | 0.95         | 0.783   |
|                                | 4    | 22          | -0.114                                           | 0.59  | -1.28        | 1.06         | 0.848   |
| <b>CSF NfL (log)</b>           |      |             |                                                  |       |              |              |         |
| Gantenerumab                   | 1    | 25          | -0.034                                           | 0.05  | -0.14        | 0.07         | 0.505   |
|                                | 2    | 26          | -0.038                                           | 0.04  | -0.12        | 0.04         | 0.367   |

|                            |   |    |        |      |       |       |        |
|----------------------------|---|----|--------|------|-------|-------|--------|
| Solanezumab                | 4 | 20 | -0.027 | 0.07 | -0.17 | 0.11  | 0.703  |
|                            | 1 | 24 | -0.050 | 0.05 | -0.14 | 0.04  | 0.268  |
|                            | 2 | 23 | -0.040 | 0.05 | -0.13 | 0.05  | 0.405  |
|                            | 4 | 22 | -0.151 | 0.06 | -0.27 | -0.03 | 0.012  |
| <b>Plasma GFAP (ng/mL)</b> |   |    |        |      |       |       |        |
| Gantenerumab               | 1 | 11 | -0.018 | 0.01 | -0.03 | 0.00  | 0.018  |
|                            | 2 | 12 | -0.032 | 0.01 | -0.05 | -0.01 | 0.001  |
|                            | 4 | 10 | -0.039 | 0.01 | -0.06 | -0.02 | <0.001 |
| Solanezumab                | 1 | 11 | 0.013  | 0.01 | 0.00  | 0.03  | 0.085  |
|                            | 2 | 12 | 0.040  | 0.01 | 0.01  | 0.07  | 0.006  |
|                            | 4 | 7  | 0.013  | 0.01 | -0.01 | 0.04  | 0.256  |
| <b>Plasma NFL (log)</b>    |   |    |        |      |       |       |        |
| Gantenerumab               | 1 | 9  | -0.016 | 0.11 | -0.24 | 0.21  | 0.883  |
|                            | 2 | 11 | -0.073 | 0.12 | -0.31 | 0.16  | 0.535  |
|                            | 4 | 10 | -0.040 | 0.14 | -0.32 | 0.24  | 0.772  |
| Solanezumab                | 1 | 10 | 0.116  | 0.12 | -0.12 | 0.35  | 0.330  |
|                            | 2 | 11 | 0.147  | 0.18 | -0.22 | 0.51  | 0.413  |
|                            | 4 | 6  | 0.104  | 0.13 | -0.17 | 0.37  | 0.437  |

S-Table 2: MMRM Estimated differences in the mean change between treatments and placebo from baseline at each post-baseline visit in symptomatic participants (CDR>0). Each year represents the time duration of drug administration since the initial biomarker assessment at baseline.

|                                | Year | Sample Size | Estimated least-square mean change from baseline | SE     | Lower 95% CI | Upper 95% CI | P-value |
|--------------------------------|------|-------------|--------------------------------------------------|--------|--------------|--------------|---------|
| <b>CSF Neurogranin (pg/mL)</b> |      |             |                                                  |        |              |              |         |
| Gantenerumab                   | 1    | 19          | 11.193                                           | 83.80  | -154.92      | 177.31       | 0.894   |
|                                | 2    | 14          | 17.691                                           | 77.78  | -136.48      | 171.86       | 0.821   |
|                                | 4    | 8           | -131.910                                         | 95.58  | -321.37      | 57.54        | 0.170   |
| Solanezumab                    | 1    | 14          | -79.981                                          | 106.16 | -290.45      | 130.49       | 0.453   |
|                                | 2    | 12          | -189.660                                         | 131.79 | -450.95      | 71.63        | 0.153   |
|                                | 4    | 8           | -235.820                                         | 264.07 | -759.37      | 287.72       | 0.374   |
| <b>CSF sTREM2 (ng/mL)</b>      |      |             |                                                  |        |              |              |         |
| Gantenerumab                   | 1    | 19          | 0.193                                            | 0.58   | -0.96        | 1.35         | 0.741   |
|                                | 2    | 14          | 0.823                                            | 0.84   | -0.84        | 2.49         | 0.329   |
|                                | 4    | 8           | 0.252                                            | 0.95   | -1.64        | 2.14         | 0.792   |
| Solanezumab                    | 1    | 15          | 0.010                                            | 1.04   | -2.05        | 2.07         | 0.992   |
|                                | 2    | 13          | -0.750                                           | 0.83   | -2.40        | 0.90         | 0.369   |
|                                | 4    | 8           | -1.404                                           | 1.59   | -4.56        | 1.75         | 0.380   |
| <b>CSF YKL-40 (ng/ml)</b>      |      |             |                                                  |        |              |              |         |
| Gantenerumab                   | 1    | 19          | 4.081                                            | 7.48   | -10.75       | 18.91        | 0.587   |
|                                | 2    | 14          | 28.428                                           | 20.92  | -13.03       | 69.89        | 0.177   |
|                                | 4    | 8           | 5.539                                            | 12.16  | -18.57       | 29.64        | 0.650   |
| Solanezumab                    | 1    | 16          | -17.342                                          | 25.21  | -67.31       | 32.63        | 0.493   |
|                                | 2    | 14          | -12.138                                          | 23.75  | -59.21       | 34.94        | 0.610   |
|                                | 4    | 8           | -58.089                                          | 34.00  | -125.48      | 9.30         | 0.090   |
| <b>CSF GFAP (ng/mL)</b>        |      |             |                                                  |        |              |              |         |
| Gantenerumab                   | 1    | 19          | -0.259                                           | 0.77   | -1.78        | 1.26         | 0.737   |
|                                | 2    | 14          | 0.313                                            | 0.81   | -1.29        | 1.91         | 0.699   |
|                                | 4    | 8           | 24.031                                           | 22.41  | -20.37       | 68.43        | 0.286   |
| Solanezumab                    | 1    | 16          | 0.674                                            | 0.80   | -0.92        | 2.27         | 0.403   |
|                                | 2    | 14          | -1.441                                           | 0.69   | -2.80        | -0.08        | 0.038   |
|                                | 4    | 8           | -2.380                                           | 1.51   | -5.36        | 0.60         | 0.117   |
| <b>CSF NfL (log)</b>           |      |             |                                                  |        |              |              |         |
| Gantenerumab                   | 1    | 19          | 0.012                                            | 0.05   | -0.09        | 0.11         | 0.806   |
|                                | 2    | 14          | 0.022                                            | 0.07   | -0.11        | 0.15         | 0.735   |
|                                | 4    | 8           | -0.081                                           | 0.06   | -0.21        | 0.05         | 0.209   |

|                            |   |    |        |      |       |       |       |
|----------------------------|---|----|--------|------|-------|-------|-------|
| Solanezumab                | 1 | 16 | 0.077  | 0.15 | -0.22 | 0.37  | 0.608 |
|                            | 2 | 14 | -0.142 | 0.07 | -0.27 | -0.01 | 0.031 |
|                            | 4 | 8  | -0.222 | 0.12 | -0.46 | 0.02  | 0.067 |
| <b>Plasma GFAP (ng/mL)</b> |   |    |        |      |       |       |       |
| Gantenerumab               | 1 | 9  | -0.029 | 0.01 | -0.06 | 0.00  | 0.057 |
|                            | 2 | 8  | -0.011 | 0.01 | -0.04 | 0.02  | 0.415 |
|                            | 4 | 3  | -0.106 | 0.03 | -0.17 | -0.04 | 0.001 |
| Solanezumab                | 1 | 7  | 0.001  | 0.02 | -0.03 | 0.03  | 0.956 |
|                            | 2 | 7  | -0.009 | 0.02 | -0.06 | 0.04  | 0.708 |
|                            | 4 | 2  | -0.015 | 0.09 | -0.20 | 0.17  | 0.869 |
| <b>Plasma NfL (log)</b>    |   |    |        |      |       |       |       |
| Gantenerumab               | 1 | 9  | -0.144 | 0.11 | -0.37 | 0.08  | 0.206 |
|                            | 2 | 8  | 0.025  | 0.19 | -0.35 | 0.40  | 0.896 |
|                            | 4 | 3  | -0.348 | 0.16 | -0.68 | -0.02 | 0.041 |
| Solanezumab                | 1 | 7  | 0.031  | 0.12 | -0.21 | 0.28  | 0.798 |
|                            | 2 | 7  | -0.119 | 0.19 | -0.52 | 0.28  | 0.545 |
|                            | 4 | 2  | -0.123 | 0.26 | -0.65 | 0.40  | 0.637 |

S-Table 3: Spearman's correlations of fluid biomarkers and imaging measures in participants receiving gantenerumab, solanezumab or placebo.

| <b>Gantenerumab</b> |                  |             |               |          |            |            |                 |               |               |         |
|---------------------|------------------|-------------|---------------|----------|------------|------------|-----------------|---------------|---------------|---------|
| <b>Correlations</b> | Plasma NfL (log) | Plasma GFAP | CSF NfL (log) | CSF GFAP | CSF YKL-40 | CSF sTREM2 | CSF Neurogranin | MRI Precuneus | FDG Precuneus | PiB PET |
| Plasma GFAP         | 0.321            |             |               |          |            |            |                 |               |               |         |
| CSF NfL (log)       | 0.147            | -0.005      |               |          |            |            |                 |               |               |         |
| CSF GFAP            | 0.184            | 0.339       | 0.453         |          |            |            |                 |               |               |         |
| CSF YKL-40          | 0.225            | 0.363       | 0.337         | 0.321    |            |            |                 |               |               |         |
| CSF sTREM2          | 0.257            | 0.128       | 0.518         | 0.400    | 0.420      |            |                 |               |               |         |
| CSF Neurogranin     | 0.151            | 0.189       | 0.091         | 0.370    | 0.444      | 0.349      |                 |               |               |         |
| MRI Precuneus       | -0.175           | 0.196       | -0.496        | -0.101   | -0.029     | -0.235     | 0.191           |               |               |         |
| FDG Precuneus       | -0.489           | -0.536      | -0.379        | -0.360   | -0.279     | -0.005     | 0.171           | 0.377         |               |         |
| Pib Composite       | -0.082           | 0.112       | -0.127        | 0.032    | 0.038      | -0.246     | -0.005          | 0.235         | -0.121        |         |
| CDR SB              | 0.223            | 0.289       | 0.437         | 0.308    | 0.061      | 0.107      | -0.182          | -0.532        | -0.647        | 0.111   |
| <b>P-Values</b>     |                  |             |               |          |            |            |                 |               |               |         |
| Plasma GFAP         | 0.103            |             |               |          |            |            |                 |               |               |         |
| CSF NfL (log)       | 0.462            | 0.979       |               |          |            |            |                 |               |               |         |
| CSF GFAP            | 0.356            | 0.084       | 0.001         |          |            |            |                 |               |               |         |
| CSF YKL-40          | 0.257            | 0.063       | 0.020         | 0.027    |            |            |                 |               |               |         |
| CSF sTREM2          | 0.195            | 0.524       | 0.000         | 0.005    | 0.003      |            |                 |               |               |         |
| CSF Neurogranin     | 0.451            | 0.344       | 0.537         | 0.010    | 0.002      | 0.015      |                 |               |               |         |
| MRI Precuneus       | 0.380            | 0.326       | 0.000         | 0.492    | 0.843      | 0.107      | 0.194           |               |               |         |
| FDG Precuneus       | 0.016            | 0.008       | 0.011         | 0.016    | 0.064      | 0.973      | 0.260           | 0.009         |               |         |
| Pib Composite       | 0.684            | 0.578       | 0.390         | 0.829    | 0.799      | 0.092      | 0.974           | 0.100         | 0.410         |         |
| CDR SB              | 0.263            | 0.143       | 0.002         | 0.033    | 0.679      | 0.469      | 0.217           | 0.000         | 0.000         | 0.440   |
| <b>Solanezumab</b>  |                  |             |               |          |            |            |                 |               |               |         |
| <b>Correlations</b> | Plasma NfL (log) | Plasma GFAP | CSF NfL (log) | CSF GFAP | CSF YKL-40 | CSF sTREM2 | CSF Neurogranin | MRI Precuneus | FDG Precuneus | PiB PET |
| Plasma GFAP         | 0.636            |             |               |          |            |            |                 |               |               |         |
| CSF NfL (log)       | 0.231            | -0.196      |               |          |            |            |                 |               |               |         |
| CSF GFAP            | 0.265            | 0.142       | 0.545         |          |            |            |                 |               |               |         |
| CSF YKL-40          | -0.099           | -0.129      | 0.390         | 0.353    |            |            |                 |               |               |         |
| CSF sTREM2          | 0.107            | -0.098      | 0.667         | 0.713    | 0.547      |            |                 |               |               |         |
| CSF Neurogranin     | 0.107            | -0.088      | 0.254         | 0.600    | 0.537      | 0.518      |                 |               |               |         |
| MRI Precuneus       | 0.079            | 0.108       | -0.427        | -0.219   | -0.085     | -0.144     | 0.016           |               |               |         |
| FDG Precuneus       | -0.032           | 0.055       | -0.466        | -0.179   | -0.161     | -0.185     | 0.042           | 0.452         |               |         |
| Pib Composite       | -0.201           | -0.154      | -0.418        | -0.384   | -0.346     | -0.357     | -0.260          | 0.209         | 0.046         |         |
| CDR SB              | 0.026            | 0.221       | 0.377         | 0.327    | -0.085     | 0.211      | -0.265          | -0.601        | -0.505        | -0.158  |
| <b>P-Values</b>     |                  |             |               |          |            |            |                 |               |               |         |
| Plasma GFAP         | 0.001            |             |               |          |            |            |                 |               |               |         |

|                 |       |       |       |       |       |       |       |       |       |       |
|-----------------|-------|-------|-------|-------|-------|-------|-------|-------|-------|-------|
| CSF NfL (log)   | 0.312 | 0.380 |       |       |       |       |       |       |       |       |
| CSF GFAP        | 0.245 | 0.528 | 0.000 |       |       |       |       |       |       |       |
| CSF YKL-40      | 0.670 | 0.565 | 0.012 | 0.024 |       |       |       |       |       |       |
| CSF sTREM2      | 0.645 | 0.665 | 0.000 | 0.000 | 0.000 |       |       |       |       |       |
| CSF Neurogranin | 0.653 | 0.703 | 0.114 | 0.000 | 0.000 | 0.001 |       |       |       |       |
| MRI Precuneus   | 0.728 | 0.624 | 0.007 | 0.179 | 0.607 | 0.381 | 0.925 |       |       |       |
| FDG Precuneus   | 0.896 | 0.815 | 0.004 | 0.289 | 0.341 | 0.271 | 0.806 | 0.002 |       |       |
| Pib Composite   | 0.380 | 0.492 | 0.010 | 0.018 | 0.034 | 0.028 | 0.120 | 0.168 | 0.766 |       |
| CDR SB          | 0.907 | 0.300 | 0.015 | 0.037 | 0.597 | 0.185 | 0.098 | 0.000 | 0.000 | 0.293 |

### Placebo

| Correlations    | Plasma NfL (log) | Plasma GFAP | CSF NfL (log) | CSF GFAP | CSF YKL-40 | CSF sTREM2 | CSF Neurogranin | MRI Precuneus | FDG Precuneus | PiB PET |
|-----------------|------------------|-------------|---------------|----------|------------|------------|-----------------|---------------|---------------|---------|
| Plasma GFAP     | 0.569            |             |               |          |            |            |                 |               |               |         |
| CSF NfL (log)   | 0.383            | -0.140      |               |          |            |            |                 |               |               |         |
| CSF GFAP        | -0.151           | -0.463      | 0.272         |          |            |            |                 |               |               |         |
| CSF YKL-40      | 0.119            | -0.308      | 0.312         | 0.100    |            |            |                 |               |               |         |
| CSF sTREM2      | 0.191            | -0.323      | 0.527         | 0.388    | 0.341      |            |                 |               |               |         |
| CSF Neurogranin | -0.405           | -0.618      | 0.010         | 0.315    | 0.458      | 0.318      |                 |               |               |         |
| MRI Precuneus   | 0.091            | -0.108      | -0.338        | -0.183   | 0.006      | -0.089     | 0.384           |               |               |         |
| FDG Precuneus   | -0.406           | -0.422      | -0.079        | 0.138    | -0.028     | 0.059      | 0.485           | 0.488         |               |         |
| Pib Composite   | 0.147            | -0.147      | -0.130        | -0.066   | -0.110     | -0.198     | 0.019           | 0.134         | 0.322         |         |
| CDR SB          | 0.023            | 0.315       | 0.253         | -0.146   | -0.016     | -0.151     | -0.617          | -0.758        | -0.629        | -0.278  |

### P-Values

|                 |       |       |       |       |       |       |       |       |       |       |
|-----------------|-------|-------|-------|-------|-------|-------|-------|-------|-------|-------|
| Plasma GFAP     | 0.008 |       |       |       |       |       |       |       |       |       |
| CSF NfL (log)   | 0.107 | 0.555 |       |       |       |       |       |       |       |       |
| CSF GFAP        | 0.536 | 0.041 | 0.108 |       |       |       |       |       |       |       |
| CSF YKL-40      | 0.626 | 0.186 | 0.065 | 0.560 |       |       |       |       |       |       |
| CSF sTREM2      | 0.431 | 0.164 | 0.001 | 0.020 | 0.043 |       |       |       |       |       |
| CSF Neurogranin | 0.086 | 0.004 | 0.955 | 0.062 | 0.005 | 0.059 |       |       |       |       |
| MRI Precuneus   | 0.695 | 0.632 | 0.048 | 0.292 | 0.971 | 0.610 | 0.023 |       |       |       |
| FDG Precuneus   | 0.077 | 0.058 | 0.676 | 0.465 | 0.882 | 0.756 | 0.007 | 0.004 |       |       |
| Pib Composite   | 0.524 | 0.511 | 0.455 | 0.706 | 0.527 | 0.252 | 0.914 | 0.413 | 0.064 |       |
| CDR SB          | 0.922 | 0.153 | 0.136 | 0.394 | 0.928 | 0.378 | 0.000 | 0.000 | 0.000 | 0.087 |

S-Table 4: MRMM analysis of the longitudinal changes compared to placebo in CSF and plasma biomarkers during treatment with gantenerumab or solanezumab, excluding a visually identified outlier in the gantenerumab arm.

Each year represents the time duration of drug administration since the initial biomarker assessment at baseline.

|                                | Year | Estimated least-square mean change from baseline | SE    | Lower 95% CI | Upper 95% CI | P-value |
|--------------------------------|------|--------------------------------------------------|-------|--------------|--------------|---------|
| <b>CSF Neurogranin (pg/mL)</b> |      |                                                  |       |              |              |         |
| Gantenerumab                   | 1    | -23.029                                          | 48.57 | -119.69      | 73.63        | 0.637   |
|                                | 2    | -46.305                                          | 61.44 | -168.57      | 75.96        | 0.453   |
|                                | 4    | -248.970                                         | 64.06 | -376.46      | -121.49      | <0.001  |
| Solanezumab                    | 1    | 1.182                                            | 53.87 | -106.16      | 108.53       | 0.983   |
|                                | 2    | 8.507                                            | 63.98 | -118.98      | 135.99       | 0.895   |
|                                | 4    | 23.712                                           | 96.44 | -168.44      | 215.87       | 0.807   |
| <b>CSF sTREM2 (ng/mL)</b>      |      |                                                  |       |              |              |         |
| Gantenerumab                   | 1    | 0.629                                            | 0.33  | -0.03        | 1.29         | 0.061   |
|                                | 2    | 1.170                                            | 0.44  | 0.30         | 2.04         | 0.009   |
|                                | 4    | 1.060                                            | 0.53  | 0.01         | 2.11         | 0.047   |
| Solanezumab                    | 1    | 0.021                                            | 0.47  | -0.91        | 0.96         | 0.965   |
|                                | 2    | -0.026                                           | 0.42  | -0.86        | 0.81         | 0.951   |
|                                | 4    | 0.436                                            | 0.59  | -0.73        | 1.61         | 0.460   |
| <b>CSF YKL-40 (ng/ml)</b>      |      |                                                  |       |              |              |         |
| Gantenerumab                   | 1    | 7.244                                            | 4.90  | -2.51        | 17.00        | 0.143   |
|                                | 2    | 14.122                                           | 8.55  | -2.89        | 31.13        | 0.102   |
|                                | 4    | 17.994                                           | 9.54  | -1.00        | 36.99        | 0.063   |
| Solanezumab                    | 1    | 8.994                                            | 10.70 | -12.32       | 30.31        | 0.403   |
|                                | 2    | 5.394                                            | 9.83  | -14.19       | 24.98        | 0.585   |
|                                | 4    | 19.511                                           | 13.28 | -6.93        | 45.96        | 0.146   |
| <b>CSF GFAP (ng/mL)</b>        |      |                                                  |       |              |              |         |
| Gantenerumab                   | 1    | -0.018                                           | 0.01  | -0.03        | 0.00         | 0.787   |
|                                | 2    | -0.024                                           | 0.01  | -0.04        | -0.01        | 0.938   |
|                                | 4    | -0.055                                           | 0.02  | -0.09        | -0.02        | 0.445   |
| Solanezumab                    | 1    | -0.006                                           | 0.01  | -0.02        | 0.01         | 0.697   |
|                                | 2    | -0.023                                           | 0.01  | -0.05        | 0.00         | 0.265   |
|                                | 4    | -0.007                                           | 0.03  | -0.06        | 0.05         | 0.146   |
| <b>CSF NfL (log)</b>           |      |                                                  |       |              |              |         |
| Gantenerumab                   | 1    | -0.019                                           | 0.04  | -0.09        | 0.06         | 0.620   |
|                                | 2    | -0.017                                           | 0.04  | -0.09        | 0.06         | 0.646   |



|                            |   |        |      |       |       |       |
|----------------------------|---|--------|------|-------|-------|-------|
| Solanezumab                | 4 | -0.052 | 0.06 | -0.17 | 0.06  | 0.366 |
|                            | 1 | -0.002 | 0.07 | -0.14 | 0.13  | 0.974 |
|                            | 2 | 0.068  | 0.04 | -0.01 | 0.15  | 0.104 |
|                            | 4 | 0.143  | 0.06 | 0.03  | 0.26  | 0.018 |
| <b>Plasma GFAP (ng/mL)</b> |   |        |      |       |       |       |
| Gantenerumab               | 1 | -0.018 | 0.01 | -0.03 | 0.00  | 0.022 |
|                            | 2 | -0.024 | 0.01 | -0.04 | -0.01 | 0.004 |
|                            | 4 | -0.055 | 0.02 | -0.09 | -0.02 | 0.001 |
| Solanezumab                | 1 | -0.006 | 0.01 | -0.02 | 0.01  | 0.466 |
|                            | 2 | -0.023 | 0.01 | -0.05 | 0.00  | 0.100 |
|                            | 4 | -0.007 | 0.03 | -0.06 | 0.05  | 0.798 |
| <b>Plasma NfL (log)</b>    |   |        |      |       |       |       |
| Gantenerumab               | 1 | -0.033 | 0.09 | -0.22 | 0.15  | 0.715 |
|                            | 2 | -0.045 | 0.11 | -0.26 | 0.17  | 0.678 |
|                            | 4 | -0.176 | 0.14 | -0.45 | 0.10  | 0.209 |
| Solanezumab                | 1 | -0.085 | 0.08 | -0.24 | 0.07  | 0.290 |
|                            | 2 | -0.012 | 0.15 | -0.31 | 0.29  | 0.935 |
|                            | 4 | -0.020 | 0.17 | -0.36 | 0.32  | 0.907 |

S-Table 5: MRMM analysis of the longitudinal changes compared to placebo in CSF and plasma biomarkers during treatment with gantenerumab or solanezumab in symptomatic participants (CDR>0), excluding a visually identified outlier in the gantenerumab arm. Each year represents the time duration of drug administration since the initial biomarker assessment at baseline.

|                                | Year | Estimated least-square mean change from baseline | SE     | Lower 95% CI | Upper 95% CI | P-value |
|--------------------------------|------|--------------------------------------------------|--------|--------------|--------------|---------|
| <b>CSF Neurogranin (pg/mL)</b> |      |                                                  |        |              |              |         |
| Gantenerumab                   | 1    | 7.031                                            | 85.84  | -163.15      | 177.22       | 0.935   |
|                                | 2    | 29.354                                           | 79.49  | -128.25      | 186.96       | 0.713   |
|                                | 4    | -160.270                                         | 96.18  | -350.96      | 30.43        | 0.099   |
| Solanezumab                    | 1    | -79.981                                          | 106.16 | -290.45      | 130.49       | 0.453   |
|                                | 2    | -189.660                                         | 131.79 | -450.95      | 71.63        | 0.153   |
|                                | 4    | -235.820                                         | 264.07 | -759.37      | 287.72       | 0.374   |
| <b>CSF sTREM2 (ng/mL)</b>      |      |                                                  |        |              |              |         |
| Gantenerumab                   | 1    | 0.177                                            | 0.59   | -1.00        | 1.36         | 0.767   |
|                                | 2    | 0.964                                            | 0.87   | -0.75        | 2.68         | 0.268   |
|                                | 4    | 0.179                                            | 0.98   | -1.76        | 2.12         | 0.856   |
| Solanezumab                    | 1    | 0.010                                            | 1.04   | -2.05        | 2.07         | 0.992   |
|                                | 2    | -0.750                                           | 0.83   | -2.40        | 0.90         | 0.369   |
|                                | 4    | -1.404                                           | 1.59   | -4.56        | 1.75         | 0.380   |
| <b>CSF YKL-40 (ng/ml)</b>      |      |                                                  |        |              |              |         |
| Gantenerumab                   | 1    | 4.394                                            | 7.66   | -10.79       | 19.58        | 0.567   |
|                                | 2    | 30.913                                           | 22.17  | -13.04       | 74.86        | 0.166   |
|                                | 4    | 9.362                                            | 12.47  | -15.35       | 34.08        | 0.454   |
| Solanezumab                    | 1    | -17.342                                          | 25.21  | -67.31       | 32.63        | 0.493   |
|                                | 2    | -12.138                                          | 23.75  | -59.21       | 34.94        | 0.610   |
|                                | 4    | -58.089                                          | 34.00  | -125.48      | 9.30         | 0.090   |
| <b>CSF GFAP (ng/mL)</b>        |      |                                                  |        |              |              |         |
| Gantenerumab                   | 1    | -0.152                                           | 0.77   | -1.68        | 1.38         | 0.844   |
|                                | 2    | 0.503                                            | 0.81   | -1.10        | 2.11         | 0.536   |
|                                | 4    | 0.456                                            | 0.94   | -1.41        | 2.33         | 0.630   |
| Solanezumab                    | 1    | 0.674                                            | 0.80   | -0.92        | 2.27         | 0.403   |
|                                | 2    | -1.441                                           | 0.69   | -2.80        | -0.08        | 0.038   |
|                                | 4    | -2.380                                           | 1.51   | -5.36        | 0.60         | 0.117   |
| <b>CSF NfL (log)</b>           |      |                                                  |        |              |              |         |
| Gantenerumab                   | 1    | 0.011                                            | 0.05   | -0.09        | 0.11         | 0.836   |
|                                | 2    | 0.033                                            | 0.07   | -0.10        | 0.17         | 0.631   |

|                            |   |        |      |       |       |       |
|----------------------------|---|--------|------|-------|-------|-------|
| Solanezumab                | 4 | -0.067 | 0.07 | -0.20 | 0.06  | 0.314 |
|                            | 1 | 0.077  | 0.15 | -0.22 | 0.37  | 0.608 |
|                            | 2 | -0.142 | 0.07 | -0.27 | -0.01 | 0.031 |
|                            | 4 | -0.222 | 0.12 | -0.46 | 0.02  | 0.067 |
| <b>Plasma GFAP (ng/mL)</b> |   |        |      |       |       |       |
| Gantenerumab               | 1 | -0.028 | 0.02 | -0.06 | 0.00  | 0.076 |
|                            | 2 | -0.010 | 0.01 | -0.04 | 0.02  | 0.448 |
|                            | 4 | -0.093 | 0.03 | -0.15 | -0.03 | 0.004 |
| Solanezumab                | 1 | 0.001  | 0.02 | -0.03 | 0.03  | 0.956 |
|                            | 2 | -0.009 | 0.02 | -0.06 | 0.04  | 0.708 |
|                            | 4 | -0.015 | 0.09 | -0.20 | 0.17  | 0.869 |
| <b>Plasma NfL (log)</b>    |   |        |      |       |       |       |
| Gantenerumab               | 1 | -0.135 | 0.12 | -0.38 | 0.11  | 0.271 |
|                            | 2 | 0.023  | 0.20 | -0.38 | 0.43  | 0.910 |
|                            | 4 | -0.281 | 0.17 | -0.62 | 0.06  | 0.101 |
| Solanezumab                | 1 | 0.031  | 0.12 | -0.21 | 0.28  | 0.798 |
|                            | 2 | -0.119 | 0.19 | -0.52 | 0.28  | 0.545 |
|                            | 4 | -0.123 | 0.26 | -0.65 | 0.40  | 0.637 |

S-Table 6: Comparison of Simoa and Elecsys Assay for CSF NfL (log). Only participants with data from both assays at each visit were included (gantenerumab n=44; placebo n=35).

|                                    | <b>Model Parameters</b>            | <b>Estimate</b>       | <b>SE</b> | <b>DF</b> | <b>t Value</b> | <b>Pr &gt;  t </b> |
|------------------------------------|------------------------------------|-----------------------|-----------|-----------|----------------|--------------------|
| <b>SIMOA</b>                       | Gantenerumab Baseline              | 6.6079                | 0.08676   | 82.1      | 76.17          | <.0001             |
|                                    | Placebo Baseline                   | 6.4567                | 0.1       | 81.6      | 64.55          | <.0001             |
|                                    | Gantenerumab rate of change        | 0.03708               | 0.0118    | 57.1      | 3.14           | 0.0027             |
|                                    | Placebo rate of change             | 0.06832               | 0.01301   | 50.9      | 5.25           | <.0001             |
|                                    | Difference between rates of change | -0.03124              | 0.01757   | 53.6      | -1.78          | 0.081              |
|                                    | <b>NTK</b>                         | Gantenerumab Baseline | 4.7699    | 0.08101   | 82             | 58.88              |
| Placebo Baseline                   |                                    | 4.6868                | 0.09344   | 81.7      | 50.16          | <.0001             |
| Gantenerumab rate of change        |                                    | 0.05184               | 0.00947   | 65.6      | 5.47           | <.0001             |
| Placebo rate of change             |                                    | 0.06201               | 0.01049   | 59.1      | 5.91           | <.0001             |
| Difference between rates of change |                                    | -0.01017              | 0.01413   | 61.9      | -0.72          | 0.4746             |

S-Figure 1: Mean change from baseline and 95% confident intervals for the treatment with gantenerumab (blue), or placebo (dashed line) based on exploratory MMRM analyses in the separate CDR subgroups (CDR 0: left column; CDR>0: right column; for exact p-Values see S-Table 1&2). Estimates were retrieved for CSF Neurogranin (A, B), CSF sTREM2 (C, D), CSF YKL-40 (E, F), CSF GFAP (G, H) and CSF NfL (log; I, J) as well as plasma GFAP (K, L) and plasma NfL (log; M, N)

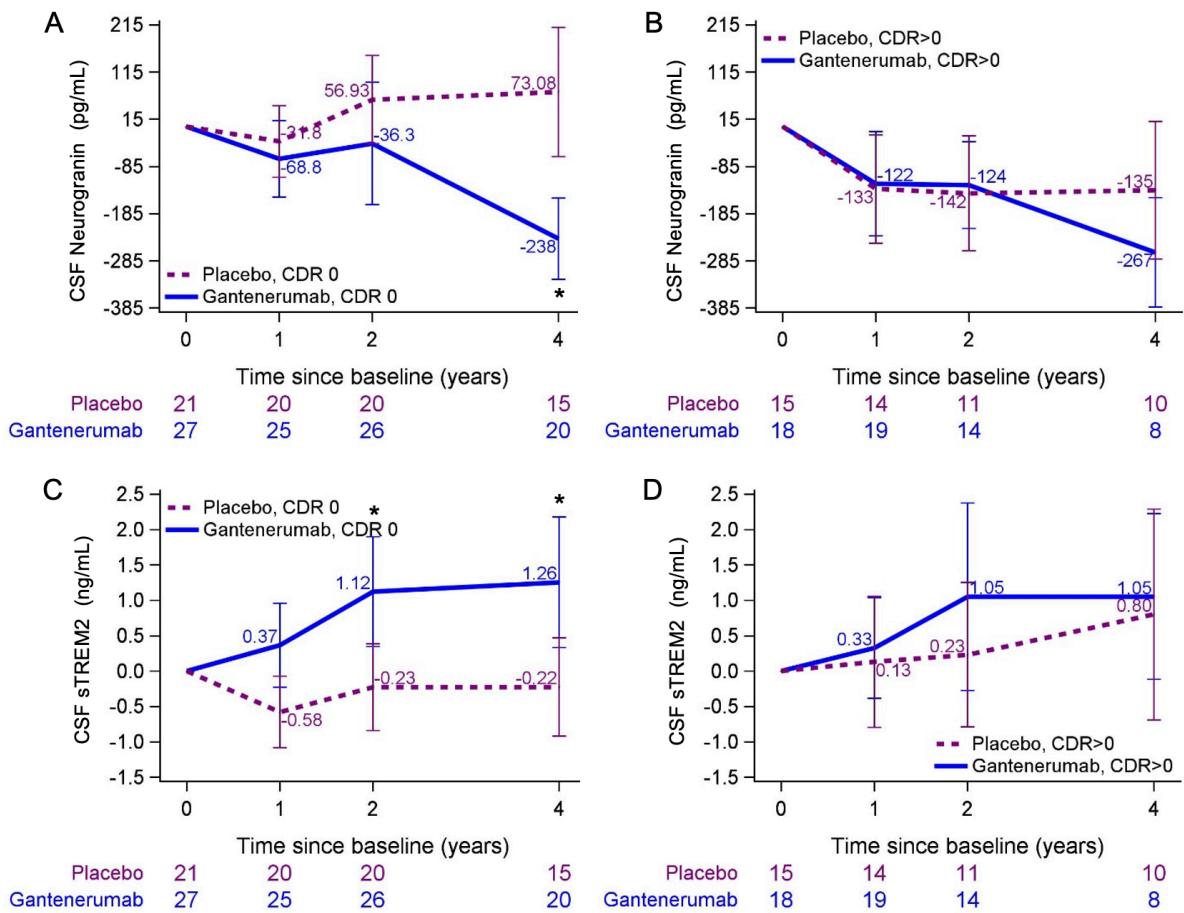

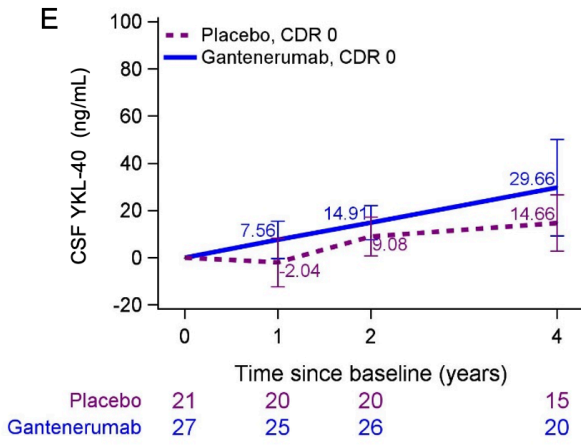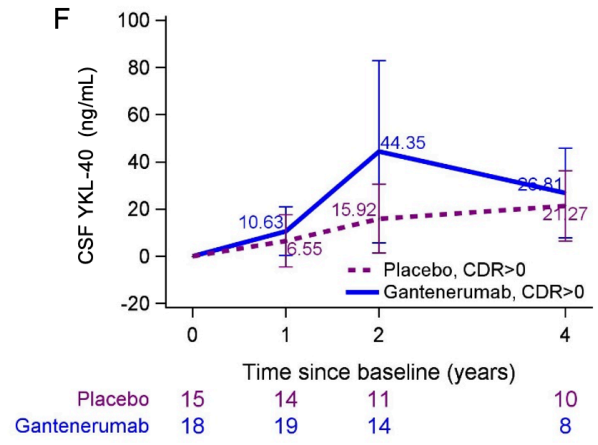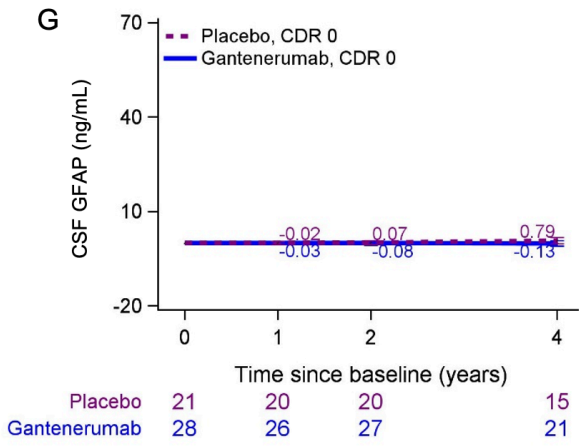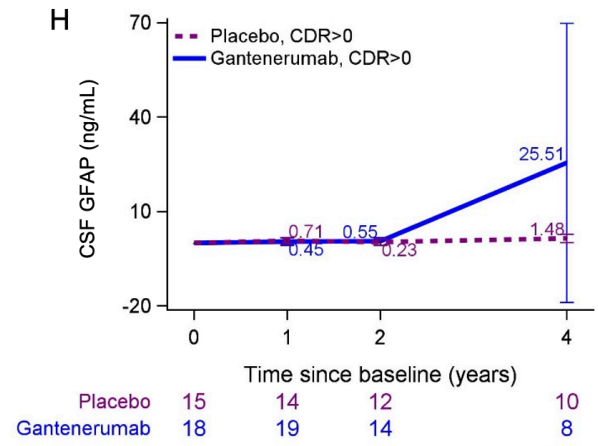

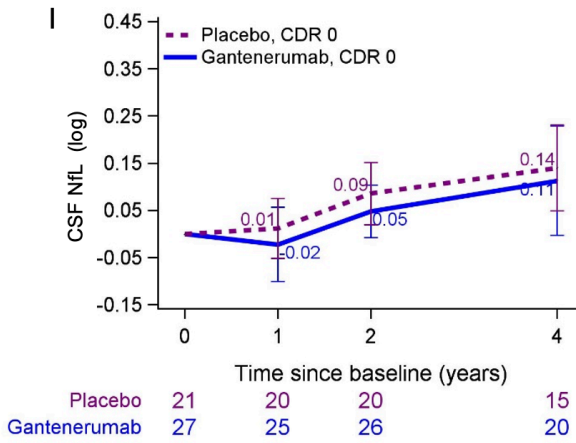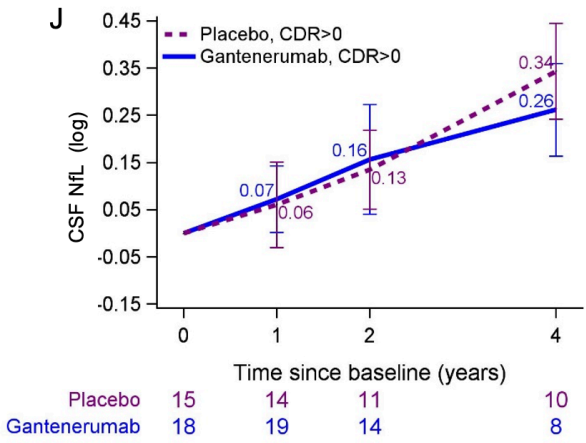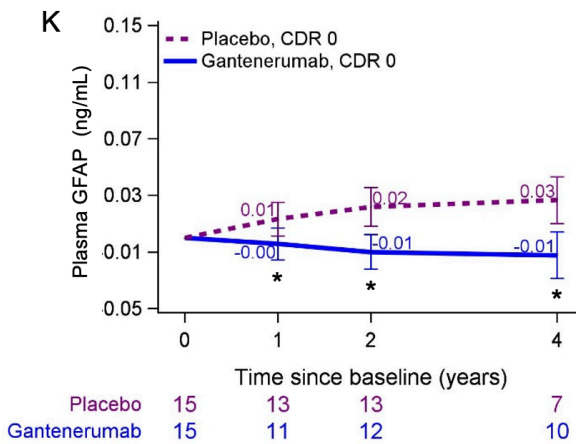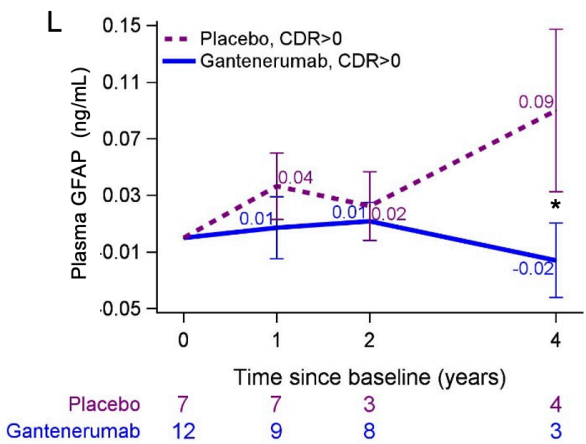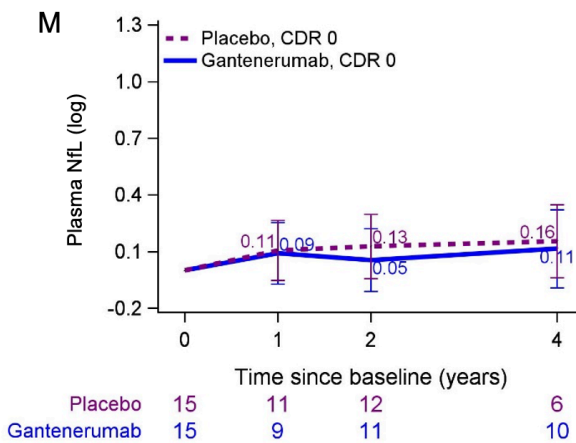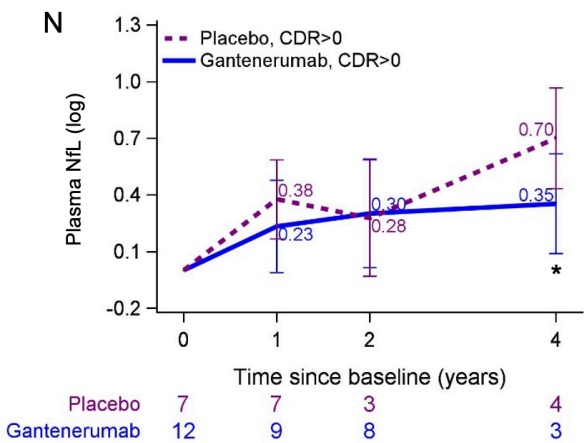

S-Figure 2: Mean change from baseline and 95% confident intervals for the treatment with solanezumab (red), or placebo (dashed line) based on exploratory MMRM analyses in the separate CDR subgroups (CDR 0: left column; CDR>0: right column; for exact p-Values see S-Table 1&2). Estimates were retrieved for CSF Neurogranin (A, B), CSF sTREM2 (C, D), CSF YKL-40 (E, F), CSF GFAP (G, H) and CSF NfL (log; I, J) as well as plasma GFAP (K, L) and plasma NfL (log; M, N).

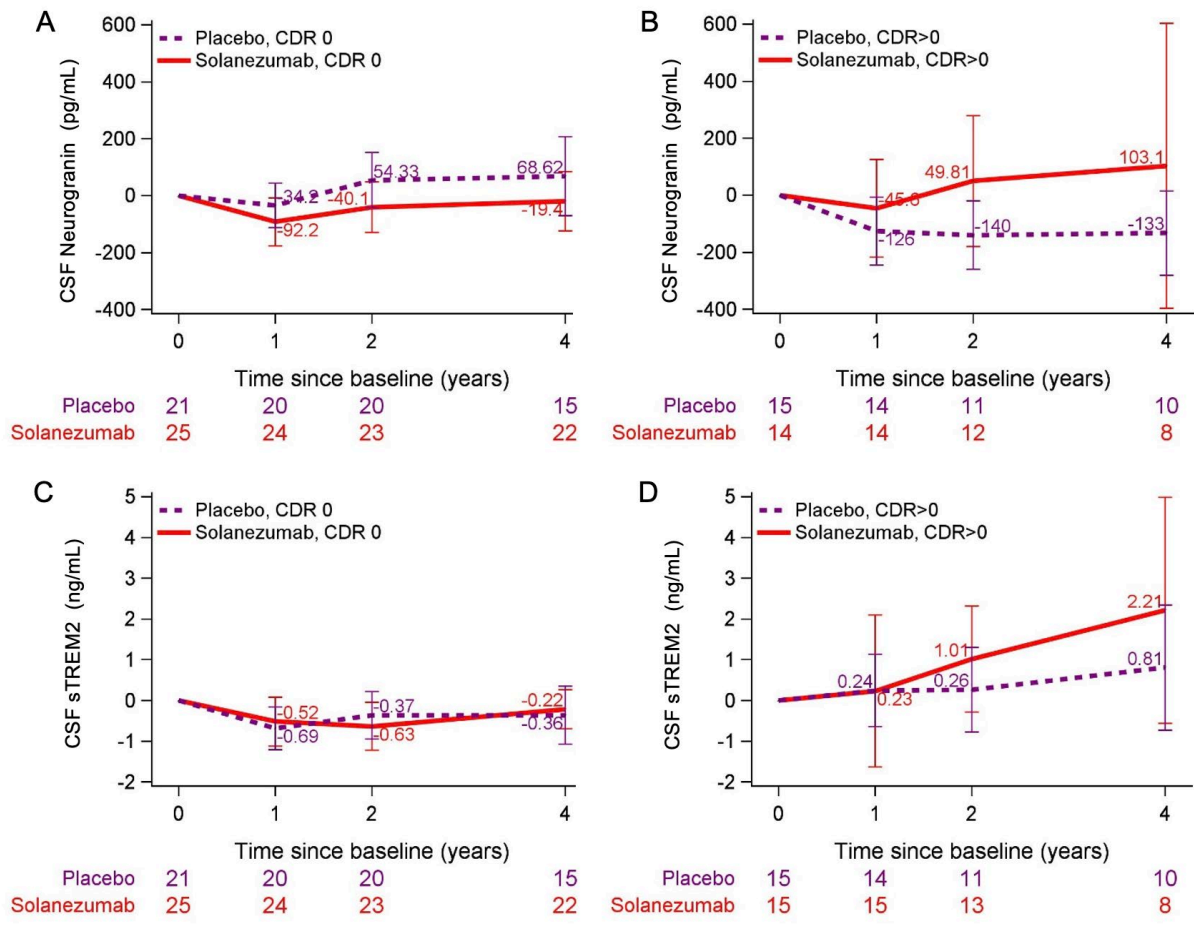



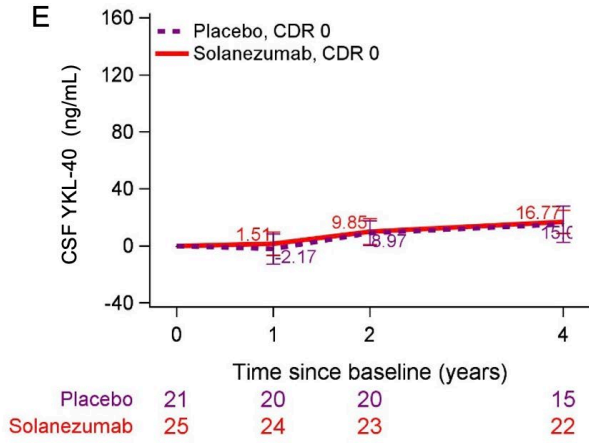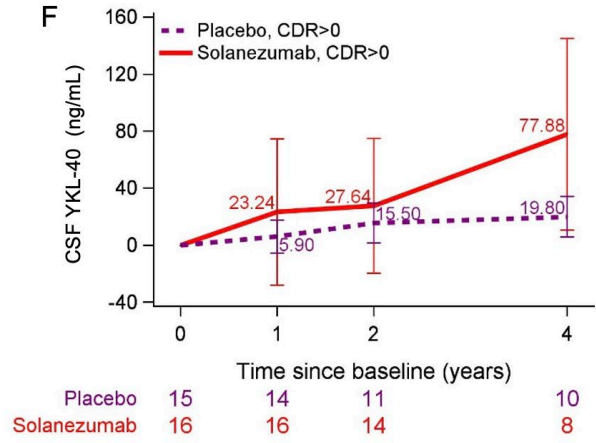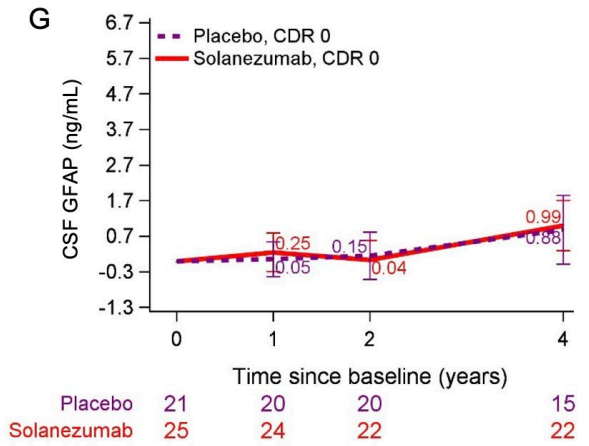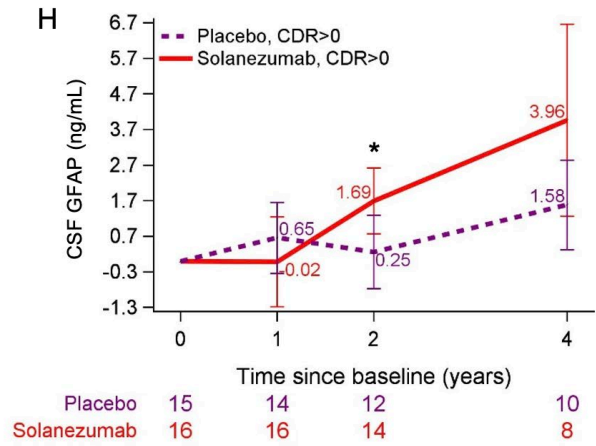

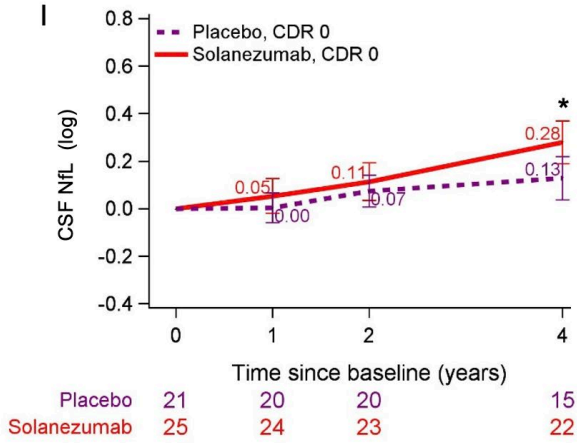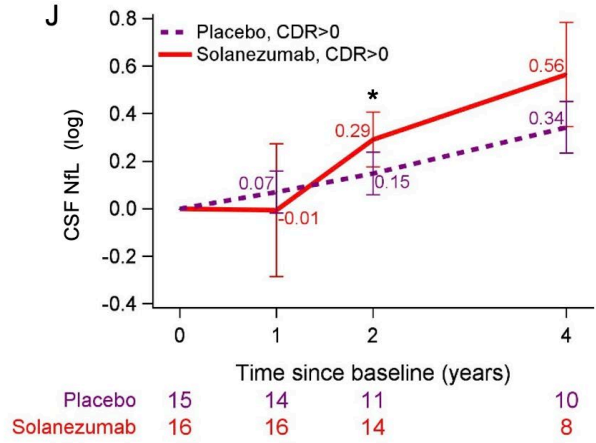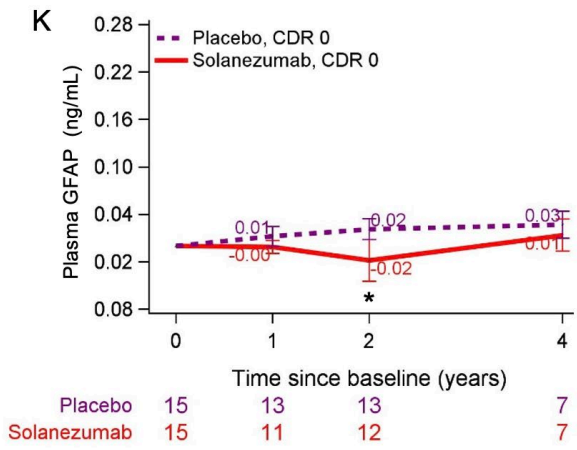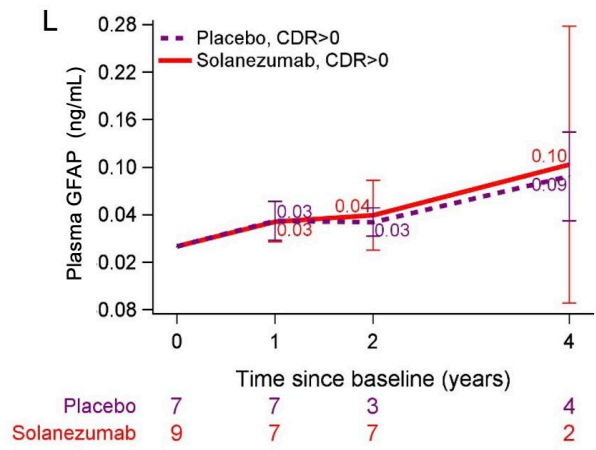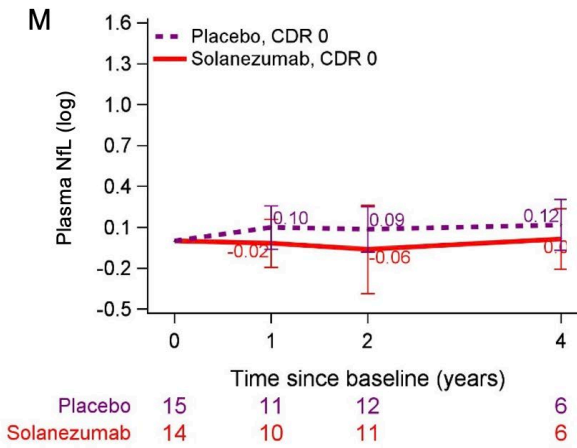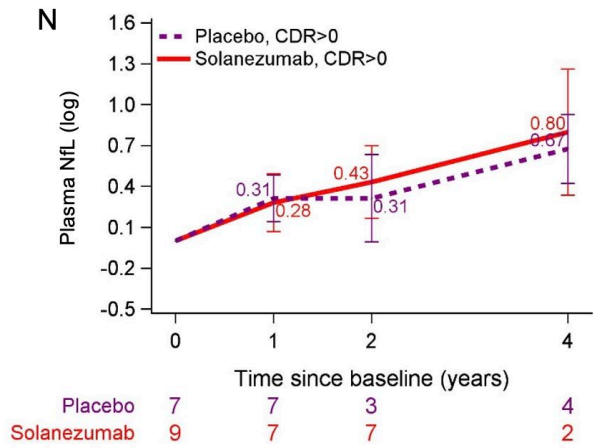

S-Figure 3: Heatmap displaying correlation coefficients derived from the individual rate of change for CSF levels of Neurogranin, sTREM2, GFAP, NfL and plasma levels of GFAP and NfL as well as PiB PET composite, FDG PET tracer binding in the Precuneus, and MRI Precuneus thickness in participants receiving placebo. ns  $P \geq 0.05$ ; \*  $P < 0.05$ ; \*\*  $P < 0.01$ ; \*\*\*  $P < 0.001$ .

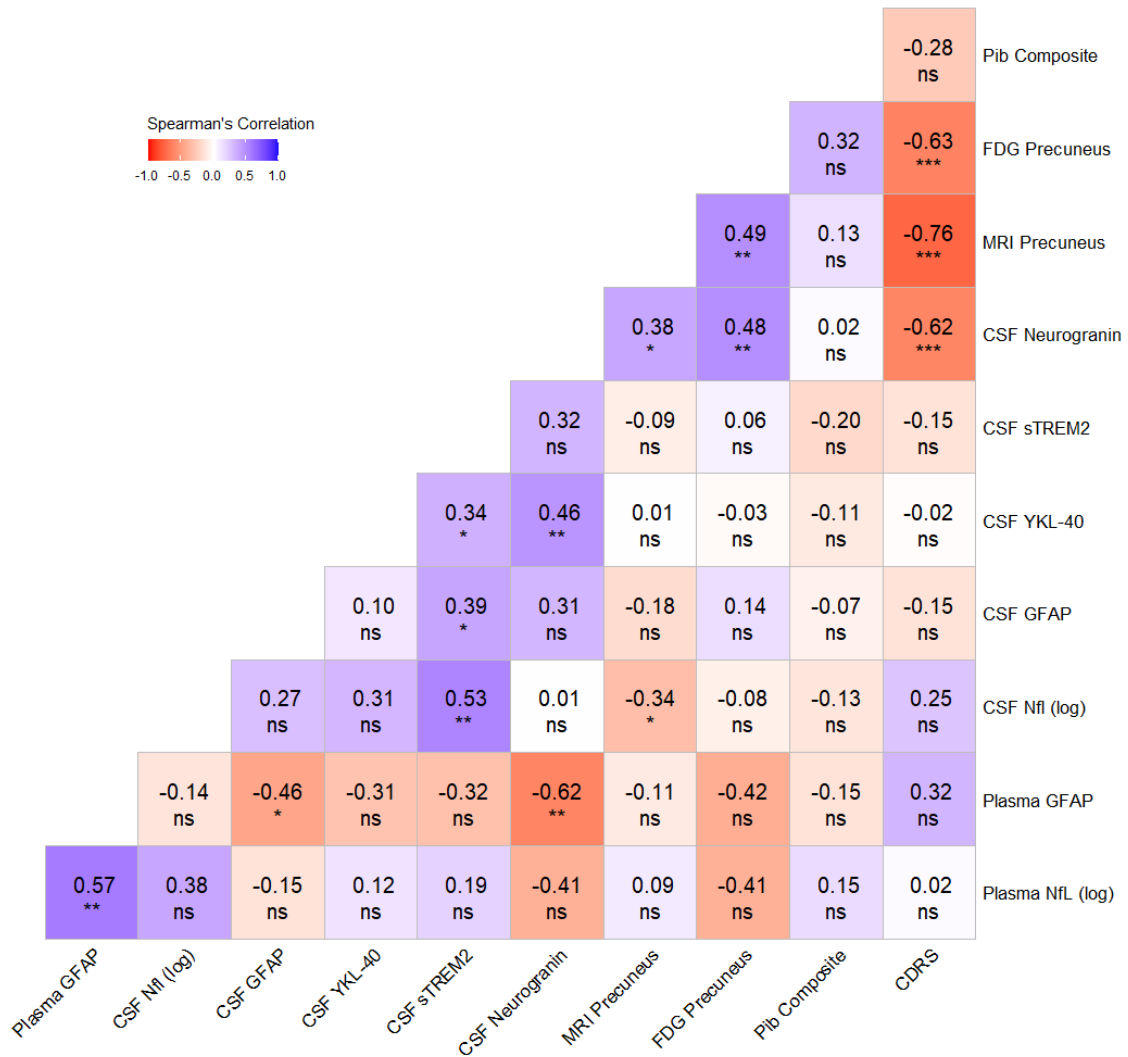

Supplement: jamaneurol-e240991-s003.pdf [file jamaneurol-e240991-s003.pdf]
