# Supplementary material for: Downstream Biomarker Effects of Gantenerumab or Solanezumab in Dominantly Inherited Alzheimer Disease: The DIAN-TU-001 Randomized Clinical Trial
Source: PubMed Central journal article supplement (PMC11059071; doi:10.1001/jamaneurol.2024.0991), 2024-04-29
Supplement: jamaneurol-e240991-s004.pdf [file jamaneurol-e240991-s004.pdf]

\*First name, last name, and suffix (if applicable) are required and will appear in PubMed.

| <b>*Group Name(s): Dominantly Inherited Alzheimer Network-Trials Unit</b> |                   |                              |                  |                       |                                          |                                                         |                                                                                            |
|---------------------------------------------------------------------------|-------------------|------------------------------|------------------|-----------------------|------------------------------------------|---------------------------------------------------------|--------------------------------------------------------------------------------------------|
| <b>*First Name and Middle Initial(s)</b>                                  | <b>*Last Name</b> | <b>*Suffix (eg, Jr, III)</b> | Academic Degrees | Institution           | Location (city, state/province, country) | Role or Contribution, eg, chair, principal investigator | Group (if more than 1 Group listed in the byline) and/or Subgroup (eg, Steering Committee) |
| Alisha J.                                                                 | Daniels           |                              |                  | Washington University | Washington University in S               | DIAN Obs Executive Director                             |                                                                                            |
| Laura                                                                     | Courtney          |                              |                  | Washington University | Washington University in S               | Admin Core                                              |                                                                                            |
| Xiong                                                                     | Xu                |                              |                  | Washington University | Washington University in S               | Biostats                                                |                                                                                            |
| Ruijin                                                                    | Lu                |                              |                  | Washington University | Washington University in S               | Biostats                                                |                                                                                            |
| Emily                                                                     | Gremminger        |                              |                  | Washington University | Washington University in S               | Biostats                                                |                                                                                            |
| Erin                                                                      | Franklin          |                              |                  | Washington University | Washington University in S               | Clinical Research Specialist                            |                                                                                            |
| Laura                                                                     | Ibanez            |                              |                  | Washington University | Washington University in S               | Biomarker Core Leader                                   |                                                                                            |
| Gina                                                                      | Jerome            |                              |                  | Washington University | Washington University in S               | Staff Scientist                                         |                                                                                            |
| Elizabeth                                                                 | Herries           |                              |                  | Washington University | Washington University in S               | Staff Scientist                                         |                                                                                            |
| Jennifer                                                                  | Stauber           |                              |                  | Washington University | Washington University in S               | Clinic Research Specialist                              |                                                                                            |
| Bryce                                                                     | Baker             |                              |                  | Washington University | Washington University in S               | Senior Lab Tech                                         |                                                                                            |
| Matthew                                                                   | Minton            |                              |                  | Washington University | Washington University in S               | Staff Scientist                                         |                                                                                            |
| Alison M.                                                                 | Goate             |                              |                  | Mount Sinai           | Dept. of Genetics & Genom                | Genetics Co-Core Leader                                 |                                                                                            |
| Alan E.                                                                   | Renton            |                              |                  | Mount Sinai           | Dept. of Genetics & Genom                | Genetics Co-Core Leader                                 |                                                                                            |
| Danielle M.                                                               | Picarello         |                              |                  | Mount Sinai           | Ronald M. Loeb Center for                | Lab Tech/Analyst                                        |                                                                                            |
| Russ                                                                      | Hornbeck          |                              |                  | Washington University | Washington University in S               | Imaging IT Project Manager III                          |                                                                                            |
| Allison                                                                   | Chen              |                              |                  | Washington University | Washington University in S               | Senior Scientist                                        |                                                                                            |
| Charles                                                                   | Chen              |                              |                  | Washington University | Washington University in S               | Research Assistant                                      |                                                                                            |
| Shaney                                                                    | Flores            |                              |                  | Washington University | Washington University in S               | Business & Technology Application Analyst 1             |                                                                                            |
| Nelly                                                                     | Joseph-Mathurin   |                              |                  | Washington University | Washington University in S               | Asst. Professor of Radiology                            |                                                                                            |
| Steve                                                                     | Jarman            |                              |                  | Washington University | Washington University in S               | Research Lab Manager                                    |                                                                                            |
| Kelley                                                                    | Jackson           |                              |                  | Washington University | Washington University in S               | Clinical Trials Manager                                 |                                                                                            |
| Sarah                                                                     | Keefe             |                              |                  | Washington University | Washington University in S               | Application Developer II                                |                                                                                            |
| Deborah                                                                   | Koudelis          |                              |                  | Washington University | Washington University in S               | Regulatory Compliance Manager                           |                                                                                            |
| Parinaz                                                                   | Massoumzadeh      |                              |                  | Washington University | Washington University in S               | Senior Scientist                                        |                                                                                            |
| Austin                                                                    | McCullough        |                              |                  | Washington University | Washington University in S               | KARI Postdoc Research Associate                         |                                                                                            |
| Nicole                                                                    | McKay             |                              |                  | Washington University | Washington University in S               | Instructor in Radiology                                 |                                                                                            |
| Joyce                                                                     | Nicklaus          |                              |                  | Washington University | Washington University in S               | Clinical Trials Manager                                 |                                                                                            |

## Supplemental Online Content: Nonauthor Collaborators

\*First name, last name, and suffix (if applicable) are required and will appear in PubMed.

| *First Name and Middle Initial(s) | *Last Name    | *Suffix (eg, Jr, III) | Academic Degrees | Institution              | Location (city, state/province, country)                               | Role or Contribution, eg, chair, principal investigator | Group (if more than 1 Group listed in the byline and/or Subgroup (eg, Steering Committee) |
|-----------------------------------|---------------|-----------------------|------------------|--------------------------|------------------------------------------------------------------------|---------------------------------------------------------|-------------------------------------------------------------------------------------------|
| Christine                         | Pulizos       |                       |                  | Washington University    | Washington University in S                                             | Project Manager                                         |                                                                                           |
| Qing                              | Wang          |                       |                  | Washington University    | Washington University in S                                             | Asst. Professor of Radiology                            |                                                                                           |
| Edita                             | Sabaredzovic  |                       |                  | Washington University    | Washington University in S                                             | Clinical Research Corrdinator I                         |                                                                                           |
| Hunter                            | Smith         |                       |                  | Washington University    | Washington University in S                                             | Neuroimaging Engineer                                   |                                                                                           |
| Jalen                             | Scott         |                       |                  | Washington University    | Washington University in S                                             | Neuroimaging Engineer                                   |                                                                                           |
| Ashlee                            | Simmons       |                       |                  | Washington University    | Washington University in S                                             | Research Tech II                                        |                                                                                           |
| Jacqueline                        | Rizzo         |                       |                  | Washington University    | Washington University in S                                             | Research Tech II                                        |                                                                                           |
| Jennifer                          | Smith         |                       |                  | Washington University    | Washington University in S                                             | Manager -Clinical Trials                                |                                                                                           |
| Sarah                             | Stout         |                       |                  | Washington University    | Washington University in S                                             | Clinical Research Specialist                            |                                                                                           |
| Celeste M.                        | Karch         |                       |                  | Washington University    | Department of Psychiatry,                                              | DIAN Obs Scientific Director                            |                                                                                           |
| Jacob                             | Marsh         |                       |                  | Washington University    | DIAN Fibroblast and Stem Cell Bank, Washington University in St. Louis |                                                         |                                                                                           |
| David M.                          | Holtzman      |                       |                  | Washington University    | Department of Neurology,                                               | DIAN Associated Director                                |                                                                                           |
| Nicolas                           | Barthelemy    |                       |                  | Washington University    | Washington University in S                                             | Neurology                                               |                                                                                           |
| Jinbin                            | Xu            |                       |                  | Washington University    | Department of Radiology, Washington University in St. Louis            |                                                         |                                                                                           |
| James M.                          | Noble         |                       |                  |                          | Taub Institute for Research                                            | Site PI                                                 |                                                                                           |
| Snezana                           | Ikonomovic    |                       |                  | University of Pittsburgh | University of Pittsburgh, De                                           | Clinical Coordinator                                    |                                                                                           |
| Neelesh K.                        | Nadkarni      |                       |                  | University of Pittsburgh | University of Pittsburgh, De                                           | Co-Investigator                                         |                                                                                           |
| Neill R.                          | Graff-Radford |                       |                  | Mayo                     | Department of Neurology,                                               |                                                         |                                                                                           |
| Takeshi                           | Ikeuchi       |                       |                  | Niigata                  | Brain Research Institute, N                                            | Site PI                                                 |                                                                                           |
| Kensaku                           | Kasuga        |                       |                  | Niigata                  | Brain Research Institute, N                                            | Co-PI                                                   |                                                                                           |
| Yoshiki                           | Niimi         |                       |                  | Tokyo                    | Specially appointed lecture                                            | Site PI                                                 |                                                                                           |
| Edward D.                         | Huey          |                       |                  | Butler                   | Memory and Aging Program                                               | Site PI                                                 |                                                                                           |
| Stephen                           | Salloway      |                       |                  | Butler                   | Memory and Aging Program                                               |                                                         |                                                                                           |
| Peter R.                          | Schofield     |                       |                  | Sydney                   | 1. Neuroscience Research A                                             | Site PI                                                 |                                                                                           |
| Jacob A.                          | Bechara       |                       |                  | Sydney                   | Neuroscience Research Au                                               |                                                         |                                                                                           |
| Ralph                             | Martins       |                       |                  | Perth                    | Edith Cowan University                                                 | Site PI                                                 |                                                                                           |
| David M.                          | Cash          |                       |                  | UCL                      | 1. Dementia Research Cent                                              |                                                         |                                                                                           |
| Natalie S.                        | Ryan          |                       |                  | UCL                      | 1. Dementia Research Cent                                              |                                                         |                                                                                           |
| Christoph                         | Laske         |                       |                  | Tubingen                 | 1.German Center for Neuro                                              |                                                         |                                                                                           |

## Supplemental Online Content: Nonauthor Collaborators

\*First name, last name, and suffix (if applicable) are required and will appear in PubMed.

| *First Name and Middle Initial(s) | *Last Name    | *Suffix (eg, Jr, III) | Academic Degrees | Institution             | Location (city, state/province, country) | Role or Contribution, eg, chair, principal investigator | Group (if more than 1 Group listed in the byline and/or Subgroup (eg, Steering Committee)) |
|-----------------------------------|---------------|-----------------------|------------------|-------------------------|------------------------------------------|---------------------------------------------------------|--------------------------------------------------------------------------------------------|
| Anna                              | Hofmann       |                       |                  | Tubingen                | 1.German Center for Neuro                |                                                         |                                                                                            |
| Elke                              | Kuder-Buletta |                       |                  | Tubingen                | German Center for Neuro                  |                                                         |                                                                                            |
| Susanne                           | Graber-Sultan |                       |                  | Tubingen                | German Center for Neuro                  |                                                         |                                                                                            |
| Ulrike                            | Obermueller   |                       |                  | Tubingen                | 1.German Center for Neuro                |                                                         |                                                                                            |
| Yvonne                            | Roedenbeck    |                       |                  | Munich                  | 1) German Center for Neur                |                                                         |                                                                                            |
| Jonathan                          | Vöglein       |                       |                  | Munich                  | 1. Department of Neurolog                | Site PI                                                 |                                                                                            |
| Jae-Hong                          | Lee           |                       |                  | Seoul                   | Asian Medical Center, Seou               | Site PI                                                 |                                                                                            |
| Jee Hoon                          | Roh           |                       |                  | Seoul                   | Korea University College of              | Secondary Site PI                                       |                                                                                            |
| Raquel                            | Sanchez-Valle |                       |                  | Barcelona               | Alzheimer's disease and ot               | Site PI                                                 |                                                                                            |
| Pedro                             | Rosa-Neto     |                       |                  | McGill                  | Translational Neuroimaging               | Site PI                                                 |                                                                                            |
| Ricardo F.                        | Allegri       |                       |                  | FLENI/Salta             | Department of Cognitive N                | Site PI                                                 |                                                                                            |
| Ezequiel                          | Surace        |                       |                  | FLENI                   | Department of Molecular B                |                                                         |                                                                                            |
| Silvia                            | Vazquez       |                       |                  | FLENI                   | Center of Molecular Imagin               |                                                         |                                                                                            |
| Francisco                         | Lopera        |                       |                  | Medellin                | Grupo de Neurociencias d                 | Site PI                                                 |                                                                                            |
| Yudy Milena                       | Leon          |                       |                  | Medellin                | Grupo de Neurociencias d                 |                                                         |                                                                                            |
| Laura                             | Ramirez       |                       |                  | Medellin                | Grupo de Neurociencias d                 |                                                         |                                                                                            |
| David                             | Aguillon      |                       |                  | Medellin                | Grupo de Neurociencias d                 |                                                         |                                                                                            |
| Allan I.                          | Levey         |                       |                  | Emory                   | Goizueta Alzheimer's Disea               | Project 3 Leader                                        |                                                                                            |
| Erik C.B                          | Johnson       |                       |                  | Emory                   | Goizueta Alzheimer's Disea               | Project 3                                               |                                                                                            |
| Nicholas T.                       | Seyfried      |                       |                  | Emory                   | Goizueta Alzheimer's Disea               | Project 3                                               |                                                                                            |
| Anne M.                           | Fagan         |                       |                  | Washington University   | Department of Neurology,                 |                                                         |                                                                                            |
| Hiroshi                           | Mori          |                       |                  |                         | Osaka Metropolitan Univer                |                                                         |                                                                                            |
| Colin                             | Masters       |                       |                  | University of Melbourne | Florey Institute, The Univer             |                                                         |                                                                                            |
